# Supplementary material for: Low cost audiovisual playback and recording triggered by radio frequency identification using Raspberry Pi
Source: PeerJ. 2015 Apr 7;3:e877. doi: 10.7717/peerj.877 (PMC4393811; doi:10.7717/peerj.877)
Supplement: Supplemental Information 1 — Table describing the approximate costs in US dollars of all components of the Raspberry Pi - RFID setup. [file peerj-03-877-s001.xlsx]

## Sheet: Sheet1
RFID -RPi system costs
	approximate costs each (in US Dollars)
Generation 2 RFID reader	35
SD card for RFID	5
Coin battery for RFID	1
copper wire to make one antenna	1.5	total per RFID unit
PIT tags	2	44.5
Raspberry Pi model A+	20	total for Rpi unit
Micro SD card for Rpi	4	24
12V motorcycle battery	18
Waterproof case for setup	5
Miscellaneous electronic items (wires, connectors, electrical tape, etc.)	2
Car USB charger	1
Micro USB cable	1.5	Total for connections, batteries etc.	Total cost per RFID-RPi unit
RS232-USB cable	4	31.5	100
battery charger	30	*at least required one to charge batteries
multimeter (voltage + inductance)	55	*one required for manually making antennas
Audio extension cable	2	*playback equipment
Sony MDRE9LP/BLK earbuds	7
Pi Camera module (optional)	25
